# Supplementary material
Source: publisher site journal article supplement (https://www.dovepress.com/article/617194)
Supplement: Supplementary file 1 [file 617194%20Revised%20Supplementary%20Material.docx]

**Supplementary materials**

Supplementary Figure S1 Flowchart of Patient Selection

Supplementary Table S1 Operational Definitions of Selected Study Variables

Supplementary Table S2 Missingness of Variables with Missing Data in the Full Cohort

Supplementary Table S3 Item Importance Ratings and Coefficients of Variation in the First Round of Expert Consultation

Supplementary Table S4 Item Importance Ratings and Coefficients of Variation in the Second Round of Expert Consultation

Supplementary Table S5 Variables with Non-Zero Coefficients Selected by LASSO Regression

Supplementary Table S6 Pairwise Comparison of AUCs among the Three Models Using the DeLong Test


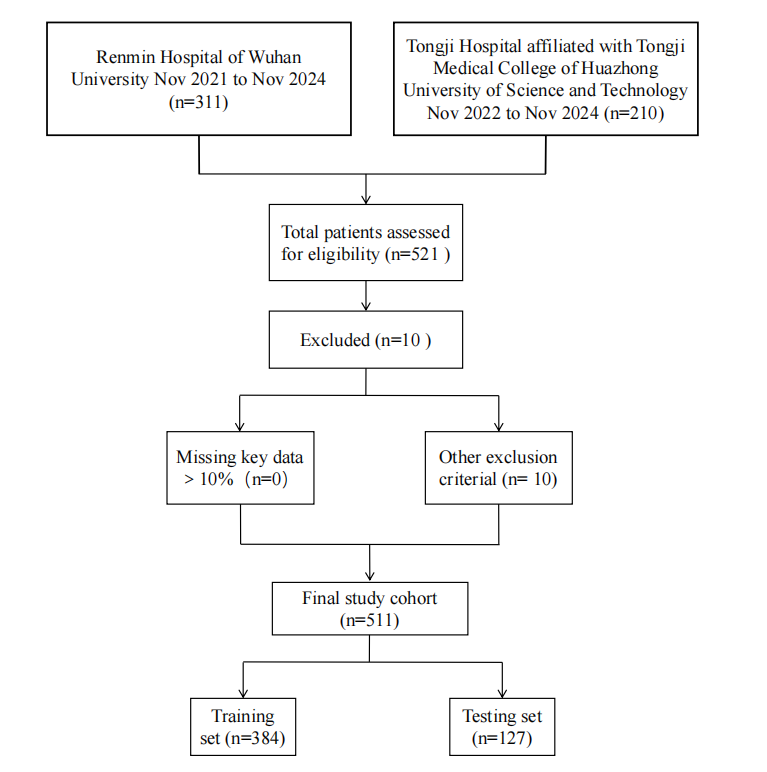


Supplementary Figure S1 Flowchart of Patient Selection

Supplementary Table S1 Operational Definitions of Selected Study Variables

| Variable | Operational definition |
| --- | --- |
| Shock | Defined as persistent systolic blood pressure <90 mmHg and/or the requirement for vasoactive agents to maintain hemodynamic stability, with or without evidence of end-organ hypoperfusion. |
| Cardiac tamponade | Defined as pericardial effusion or hemopericardium causing hemodynamic compromise. The diagnosis was based on clinical manifestations (e.g., hypotension, tachycardia) together with imaging evidence such as echocardiographic signs of right atrial or right ventricular compression or inferior vena cava dilatation. |
| Limb ischemia | Defined as an acute reduction in limb perfusion that may threaten limb viability. The diagnosis was based on clinical manifestations (e.g., pain, pallor, pulselessness, sensory deficit, or motor dysfunction) and/or imaging findings indicating restricted blood flow or vascular occlusion. |
| Cerebral hypoperfusion | Defined as newly developed neurological deficits and/or impaired consciousness, with imaging evidence suggestive of reduced cerebral blood flow or supra-aortic branch malperfusion when available. |
| Pulmonary complications | Defined as a composite endpoint including newly developed postoperative pulmonary edema, atelectasis, or pulmonary infection (pneumonia), all of which were absent preoperatively. Pulmonary edema was diagnosed based on imaging findings (e.g., chest radiography or CT suggesting pulmonary edema) together with compatible clinical respiratory deterioration. Atelectasis was diagnosed based on postoperative imaging showing lobar or segmental collapse or reduced lung aeration. Pulmonary infection (pneumonia) was diagnosed based on new pulmonary infiltrates on imaging together with clinical evidence of infection. To reduce temporal ambiguity, only pulmonary complications occurring before delayed extubation were included in the analysis. |
| Acute lung injury | Defined in reference to contemporary ARDS-related criteria. In patients with sufficient data, adjudication included acute onset (usually within 1 week of a known clinical insult), bilateral pulmonary infiltrates/opacities on chest imaging not fully explained by pleural effusions, atelectasis, or nodules, respiratory failure not fully explained by cardiogenic pulmonary edema or fluid overload, and impaired oxygenation (e.g., PaO₂/FiO₂ ≤300 mmHg). Patients with postoperative acute hypoxemia and clinical or radiological evidence of lung injury who did not fully meet strict ARDS criteria, or in whom some required elements were unavailable, were still included in this category for analysis. |

Supplementary Table S2 Missingness of Variables with Missing Data in the Full Cohort

| Variable | Missing (n) | Missing (%) |
| --- | --- | --- |
| BMI (kg/m2) | 21 | 4.110 |
| Onset-to-surgery time(hour) | 1 | 0.196 |
| White blood cell count (×109/L) | 1 | 0.196 |
| Platelet count (×109/L) | 1 | 0.196 |
| Serum creatinine(µmol/L) | 3 | 0.587 |
| CPB time(min) | 7 | 1.370 |
| Ascending aortic cross-clamp time(min) | 10 | 1.957 |
| Serum albumin(g/L) | 1 | 0.196 |
| Peak serum creatinine(µmol/L) | 1 | 0.196 |
| Lactate at end of surgery(mmol/L) | 1 | 0.196 |
| Interleukin-6(pg/mL) | 135 | 26.419 |
| Intraoperative fluid balance(mL) | 157 | 30.724 |

Supplementary Table S3 Item Importance Ratings and Coefficients of Variation in the First Round of Expert Consultation

| Variable | Mean | Standard deviation | Coefficient of variation |
| --- | --- | --- | --- |
| **Baseline characteristics** |  |  |  |
| Age | 4.67 | 0.49 | 0.10 |
| Body mass index | 3.60 | 0.83 | 0.23 |
| Sex | 4.60 | 0.51 | 0.11 |
| Smoking history | 4.73 | 0.46 | 0.10 |
| **Preoperative variables** |  |  |  |
| Onset-to-surgery time | 4.27 | 0.88 | 0.21 |
| White blood cell count | 4.13 | 0.99 | 0.24 |
| Platelet count | 3.93 | 0.80 | 0.20 |
| Blood lactate | 4.60 | 0.63 | 0.14 |
| Blood glucose | 3.40 | 0.99 | 0.29 |
| D-dimer | 3.33 | 1.23 | 0.37 |
| Cardiac troponin I | 3.47 | 1.46 | 0.42 |
| Interleukin-6 | 3.80 | 0.862 | 0.23 |
| Shock | 4.93 | 0.26 | 0.05 |
| Cerebral hypoperfusion | 4.87 | 0.35 | 0.07 |
| Cardiac tamponade | 4.93 | 0.26 | 0.05 |
| Limb ischemia | 4.53 | 0.52 | 0.11 |
| Preoperative analgesic use | 3.87 | 1.25 | 0.32 |
| **Intraoperative variables** |  |  |  |
| Cardiopulmonary bypass time | 4.73 | 0.46 | 0.10 |
| Deep hypothermic circulatory arrest | 4.80 | 0.41 | 0.09 |
| Ascending aortic cross-clamp time | 4.67 | 0.72 | 0.16 |
| Blood transfusion volume | 4.33 | 0.72 | 0.17 |
| Red blood cell transfusion volume | 4.40 | 0.63 | 0.14 |
| Ascending aortic diameter | 3.67 | 1.11 | 0.30 |
| Concomitant coronary artery bypass grafting | 4.60 | 0.51 | 0.11 |
| Concomitant other cardiac surgery | 4.53 | 0.52 | 0.11 |
| **Postoperative variables** |  |  |  |
| Serum albumin | 3.67 | 0.82 | 0.22 |
| Serum creatinine | 4.00 | 0.85 | 0.21 |
| Plasma transfusion | 4.20 | 0.78 | 0.18 |
| Platelet transfusion | 4.27 | 0.59 | 0.14 |
| Stroke | 4.93 | 0.26 | 0.05 |
| Lactate at end of surgery | 4.27 | 0.96 | 0.23 |

Supplementary Table S4 Item Importance Ratings and Coefficients of Variation in the Second Round of Expert Consultation

| Variable | Mean | Standard deviation | Coefficient of variation |
| --- | --- | --- | --- |
| **Baseline characteristics** |  |  |  |
| Age | 4.53 | 0.52 | 0.11 |
| Body mass index | 3.60 | 0.83 | 0.23 |
| Sex | 4.53 | 0.52 | 0.11 |
| Smoking history | 4.87 | 0.35 | 0.07 |
| Chronic obstructive pulmonary disease comorbidity | 5.00 | 0.00 | 0.00 |
| **Preoperative variables** |  |  |  |
| Onset-to-surgery time | 4.20 | 0.94 | 0.22 |
| White blood cell count | 4.00 | 0.93 | 0.23 |
| Platelet count | 3.87 | 0.92 | 0.24 |
| Blood lactate | 4.60 | 0.51 | 0.11 |
| Interleukin-6 | 3.80 | 0.86 | 0.23 |
| Shock | 4.87 | 0.35 | 0.07 |
| Cerebral hypoperfusion | 4.80 | 0.56 | 0.12 |
| Cardiac tamponade | 4.87 | 0.35 | 0.07 |
| Limb ischemia | 4.53 | 0.64 | 0.14 |
| Serum albumin | 4.07 | 0.80 | 0.20 |
| **Intraoperative variables** |  |  |  |
| Cardiopulmonary bypass time | 4.80 | 0.41 | 0.09 |
| Deep hypothermic circulatory arrest | 4.73 | 0.46 | 0.10 |
| Ascending aortic cross-clamp time | 4.60 | 0.74 | 0.16 |
| Blood transfusion volume | 4.40 | 0.63 | 0.14 |
| ntraoperative fluid input and output | 4.20 | 1.01 | 0.24 |
| Concomitant coronary artery bypass grafting | 4.60 | 0.63 | 0.14 |
| Concomitant other cardiac surgery | 4.60 | 0.51 | 0.11 |
| **Postoperative variables** |  |  |  |
| Serum albumin | 4.00 | 0.66 | 0.16 |
| Peak serum creatinine | 4.07 | 0.80 | 0.20 |
| Plasma transfusion | 4.40 | 0.74 | 0.17 |
| Platelet transfusion | 4.27 | 0.70 | 0.16 |
| Stroke | 4.80 | 0.56 | 0.12 |
| Lactate at end of surgery | 4.27 | 0.80 | 0.19 |
| Acute lung injury | 4.93 | 0.26 | 0.05 |
| Pulmonary complications | 4.93 | 0.26 | 0.05 |

Supplementary Table S5 Variables with Non-Zero Coefficients Selected by LASSO Regression

| Variable | Coefficient |
| --- | --- |
| preoperative blood lactate (mmol/L) | 0.0318911315 |
| CPB time (min) | 0.0024623979 |
| peak postoperative serum creatinine (µmol/L) | 0.0016264450 |
| postoperative plasma transfusion (mL) | 0.0007163904 |
| lactate at the end of surgery (mmol/L) | 0.0222939682 |
| pulmonary complications | 0.3932615242 |

Supplementary Table S6 Pairwise Comparison of AUCs among the Three Models Using the DeLong Test

| Comparison | AUC of model 1 | AUC of model 2 | AUC difference | *Z* statistic | *P* |
| --- | --- | --- | --- | --- | --- |
| XGBoost vs. SVM | 0.784 | 0.820 | -0.0352 | -1.26 | 0.207 |
| XGBoost vs. Logistic regression | 0.784 | 0.805 | -0.0210 | -0.663 | 0.507 |
| SVM vs. Logistic regression | 0.820 | 0.805 | 0.0142 | 1.60 | 0.111 |
